# Supplementary material for: Predictive Value of the KOJI AWARENESS Self-Evaluation System for Running Injuries in Elite Male Long-Distance Runners: A Prospective Cohort Study
Source: PubMed Central journal article supplement — Orthop J Sports Med. 2024 Aug 12;12(8):23259671241260517. doi: 10.1177/23259671241260517 (PMC11322930; doi:10.1177/23259671241260517), 2024-08-12
Supplement: sj-pdf-1-ojs-10.1177_23259671241260517.pdf [file sj-pdf-1-ojs-10.1177_23259671241260517.pdf]

# KOJI AWARENESS

**Self screening test**

# 1, Neck Mobility (Total 6pt)

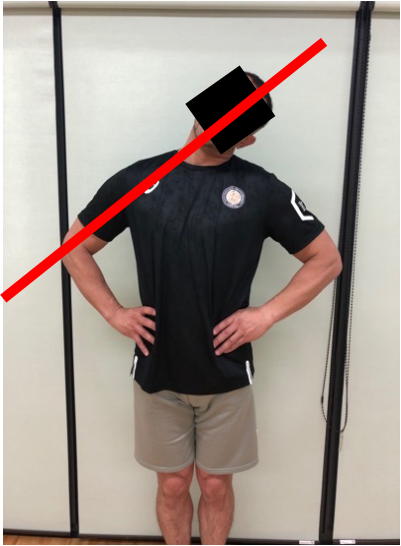

**Movement:** Lateral flexion  
**Instruction & Criteria:** Can bend the midline of face parallel to the upper arm?  
L) Yes: 1pt, No: 0pt  
R) Yes: 1pt, No: 0pt

**Tips:** Tilt head without moving the shoulder

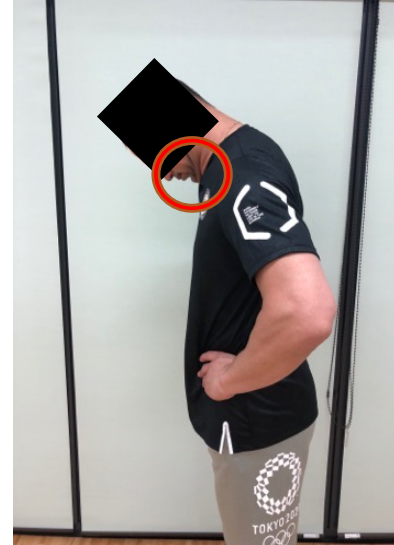

**Movement:** Flexion  
**Instruction & Criteria:** Bring the chin towards chest, can touch the chest with chin?  
Yes: 1pt, No: 0pt  
**Tips:** Do not open mouth

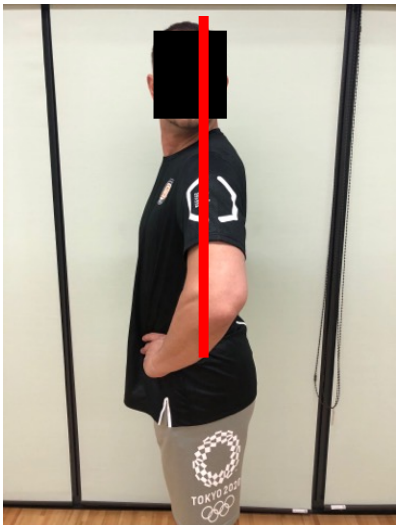

**Movement:** Rotation  
**Instruction & Criteria:** Can rotate the midline of face parallel to the shoulder?  
L) Yes: 1pt, No: 0pt  
R) Yes: 1pt, No: 0pt

**Tips:** Rotate head without moving the shoulder

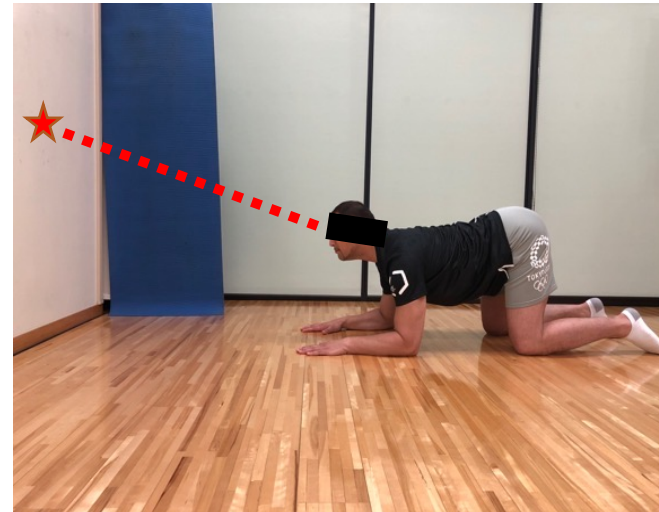

**Movement:** Extension  
**Instruction & Criteria:** Lie on elbows and knees with finger tips at 4 foot lengths away from wall, can see 2-elbow height mark on wall without difficulty,  
Yes: 1pt, No: 0pt

**Tips:** No, if not see mark clearly

## 2, Shoulder Mobility (LR 2pt)

**Movement:** Shoulder internal rotation

**Instruction & Criteria:** Stand with a back of hand on lower back, reach towards the opposite shoulder blade, can touch inferior angle of the blade?

L) Yes: 1pt, No: 0pt

R) Yes: 1pt, No: 0pt

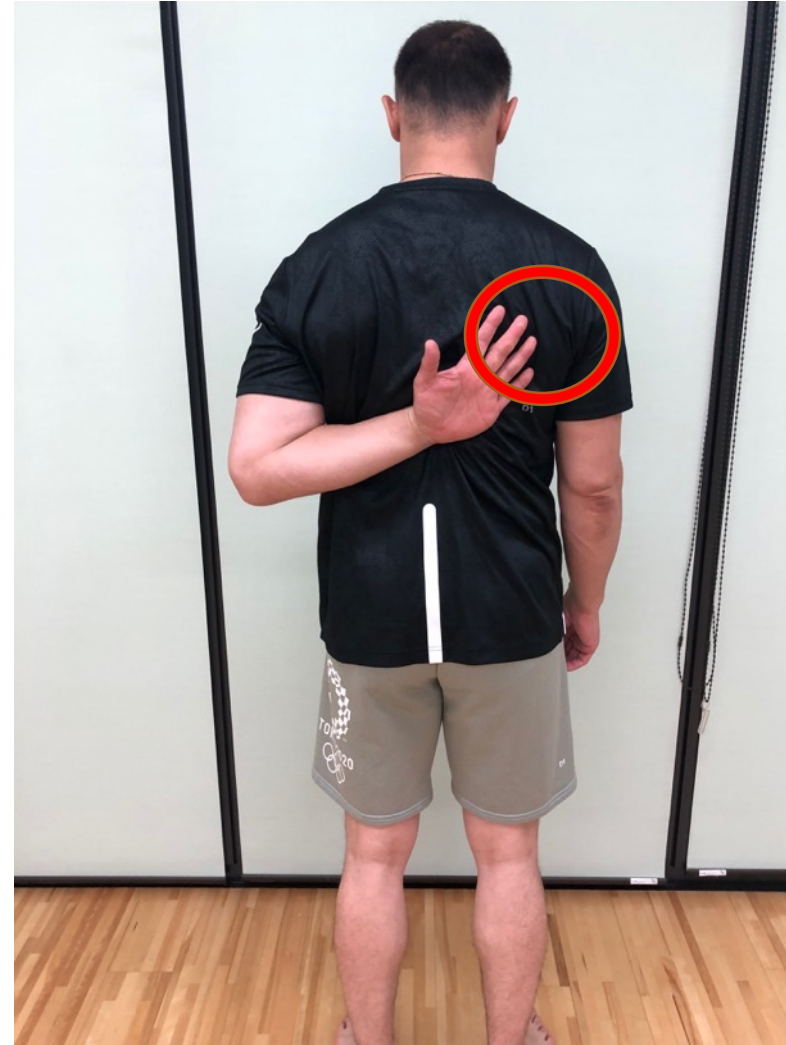

# 3, Shoulder Blade (Scapular) Mobility (LR 2pt)

**Movement:** Shoulder external rotation, Scapular upward rotation

**Instruction & Criteria:** Stand in front of mirror with finger tips holding opposite earlobe, move the arm around the head and back, can arch of the arm go around the head without head tilt?

L) Yes: 1pt, No: 0pt

R) Yes: 1pt, No: 0pt

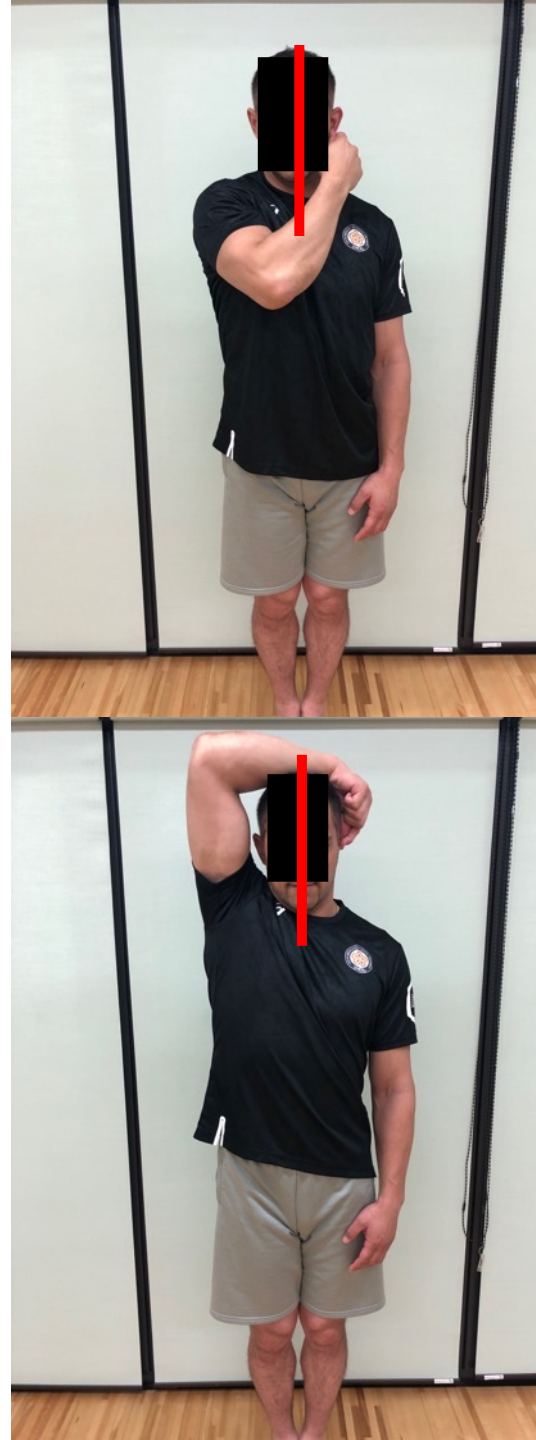

# 4, Thoracic Spine Mobility (LR total 6pt)

**Setup:** sit 2 knuckles away from wall with knees together

**Movement:** Thoracic spine rotation

Level 1

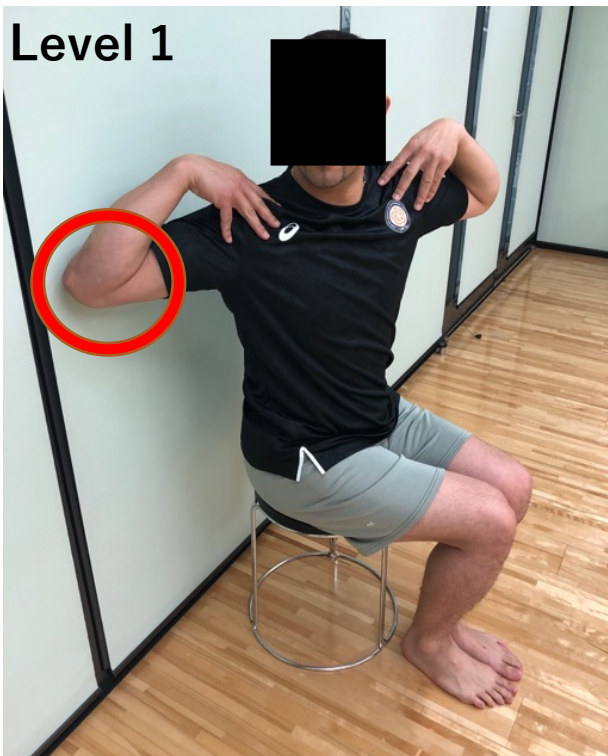

Level 2

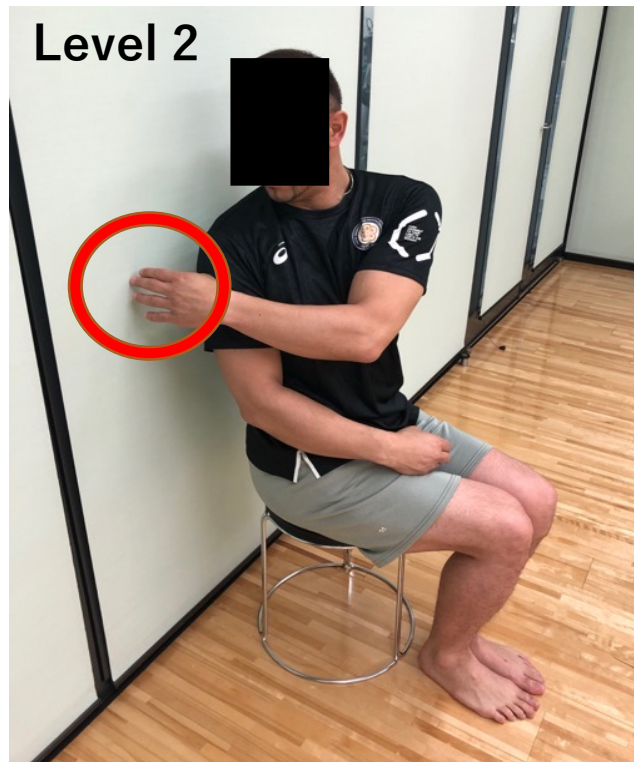

Level 3

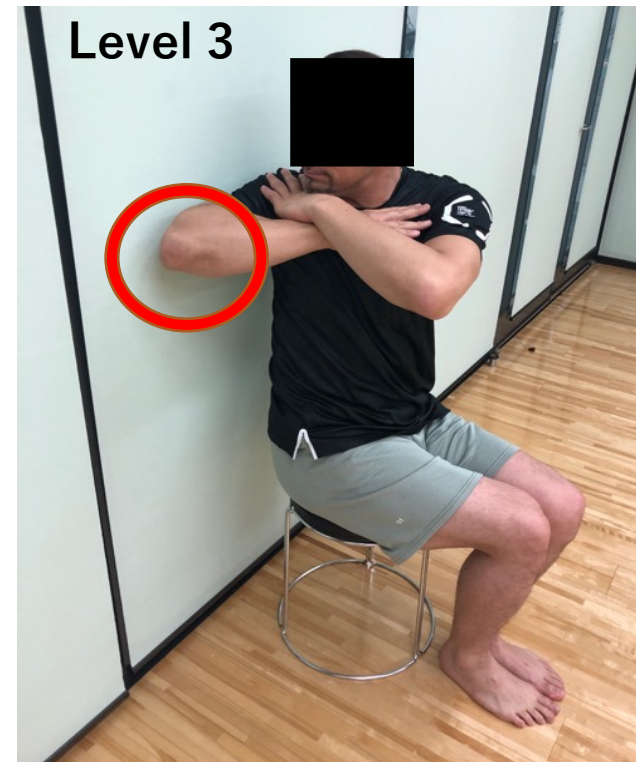

**Instruction & Criteria:** : Rotate body to reach towards wall, can touch wall with elbow while knees are together?

L) Yes: 1pt, No: 0pt

R) Yes: 1pt, No: 0pt

**Instruction & Criteria:** Rotate body to reach towards wall with opposite hand, can touch wall with hand by the shoulder while knees are together?

L) Yes: 2pt, No: 0pt

R) Yes: 2pt, No: 0pt

**Instruction & Criteria:** Rotate body, can touch wall with an upper arm between shoulder and elbow, while knees are together?

L) Yes: 3pt, No: 0pt

R) Yes: 3pt, No: 0pt

# 5, Upper Extremity Stability & Strength (4pt)

**Movement:** Upper Extremity Stability & Strength

## Instruction & Criteria:

**Level 1)** Create front hand-plank position on wall, feet at 4 foot lengths away, hands shoulder width at level of eyes, hold plank position. Can hold position for 10 seconds while head, pelvis, ankles are in line? Yes: 1pt, No: 0pt

**Level 2)** Create front hand-plank position on floor with bent knees, hold plank position. Can hold position for 10 seconds while head, pelvis, ankles are in line? Yes: 2pt, No: 0pt

**Level 3)** Create front hand-plank position on floor, hold plank position. Can hold position for 10 seconds while head, pelvis, ankles are in line? Yes: 3pt, No: 0pt

**Level 4)** Start with front hand-plank position 5 seconds, then side hand-plank followed by opposite side 3 seconds. Can hold each position while head, pelvis, ankles are in line? Yes: 4pt, No: 0pt

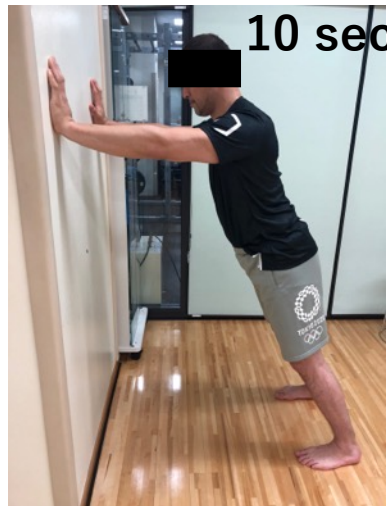

Level 1

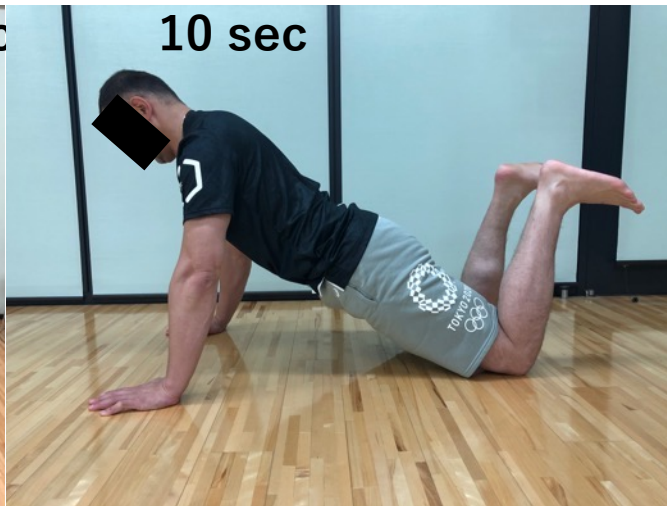

Level 2

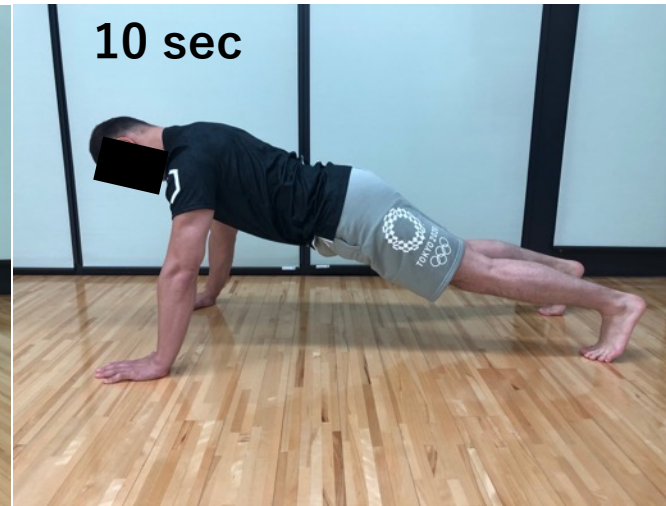

Level 3

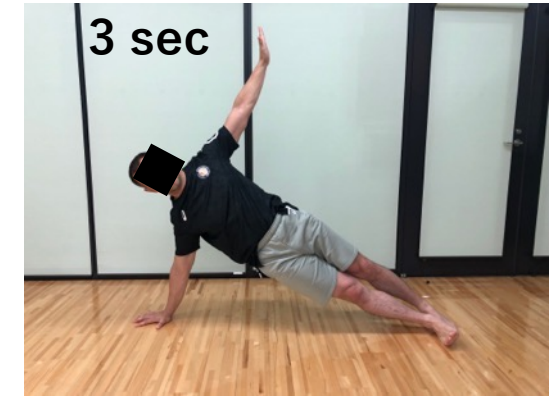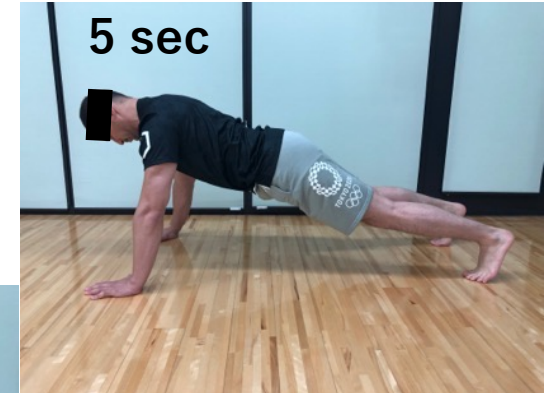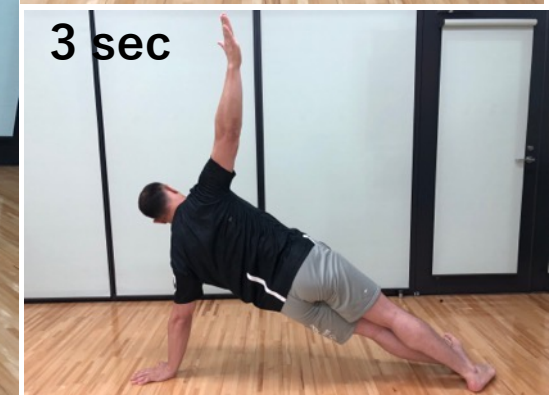

Level 4

# 6, Hip Mobility (total 8pt)

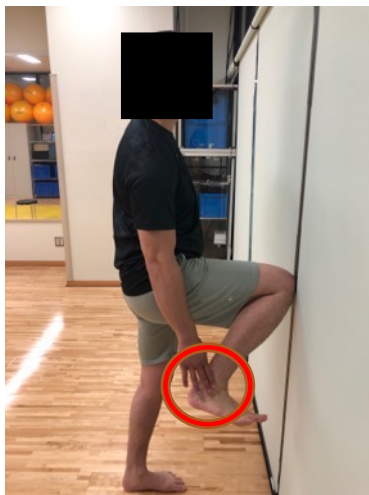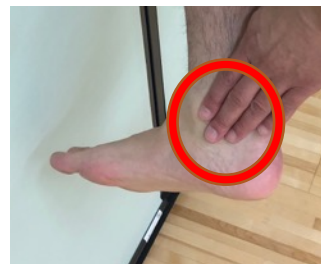

**Touch malleolus**  
**Lateral: internal**  
**Medial: external**

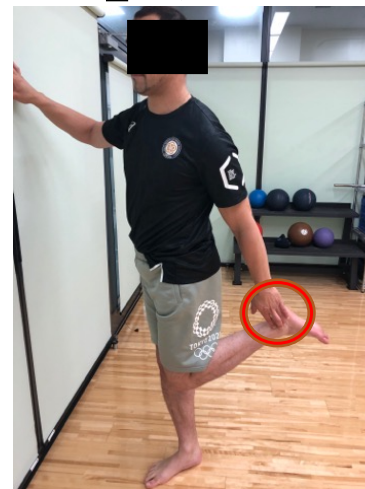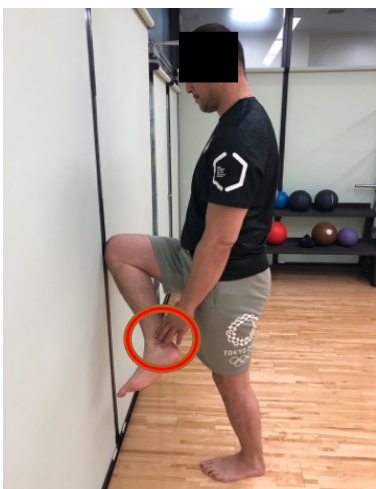

**Movement:** Hip internal rotation (hip flexed)

**Instruction & Criteria:** Stand in front of wall, 1 foot & 1 knuckle away, keep a knee on wall with the thigh parallel to the floor. Rotate leg to inside and can touch lateral malleolus without tilting torso?

L) Yes: 1pt, No: 0pt  
R) Yes: 1pt, No: 0pt

**Movement:** Hip external rotation (hip flexed)  
**Instruction & Criteria:** Stand in front of wall, 1 foot & 1 knuckle away, keep a knee on wall with the thigh parallel to the floor. Rotate leg to outside and can touch medial malleolus without tilting torso? L) Yes: 1pt, No: 0pt R) Yes: 1pt, No: 0pt

**Movement:** Hip internal rotation (hip extend)

**Instruction & Criteria:** Bend knee towards buttocks while standing on one leg, keep knees together. rotate leg to outside, touch ankle, can touch medial malleolus without tilting torso?

L) Yes: 1pt, No: 0pt  
R) Yes: 1pt, No: 0pt

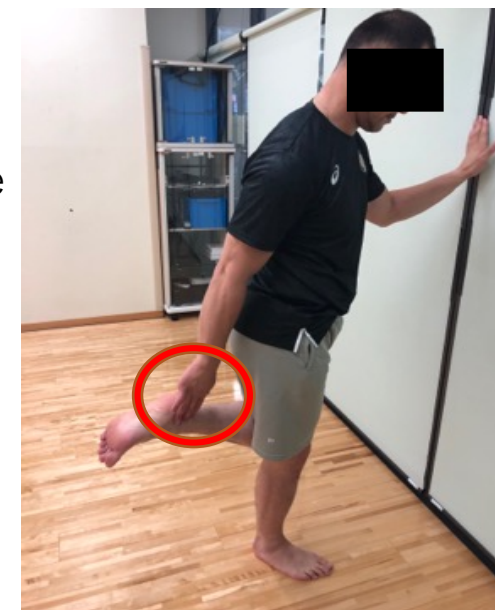

**Movement:** Hip external rotation (hip extend)

**Instruction & Criteria:** Bend knee towards buttocks while standing on one leg, keep knees together. rotate leg to inside, can touch lateral malleolus without tilting torso?

L) Yes: 1pt, No: 0pt. R) Yes: 1pt, No: 0pt

# 7, Hip and Spine Mobility (6pt)

**Movement:** Hip flexion (Hamstring tightness), trunk flexion (erector spinae)

## Instruction & Criteria:

**Level 1)** Stand with feet shoulder width, can touch one knuckle above ankle? Yes: 1pt, No: 0pt

**Level 2)** Bend over to reach ankle joint, can touch ankle joint? Yes: 2pt, No: 0pt

**Level 3)** Bend over to reach toe, can touch toes? Yes: 3pt, No: 0pt

## Flexion

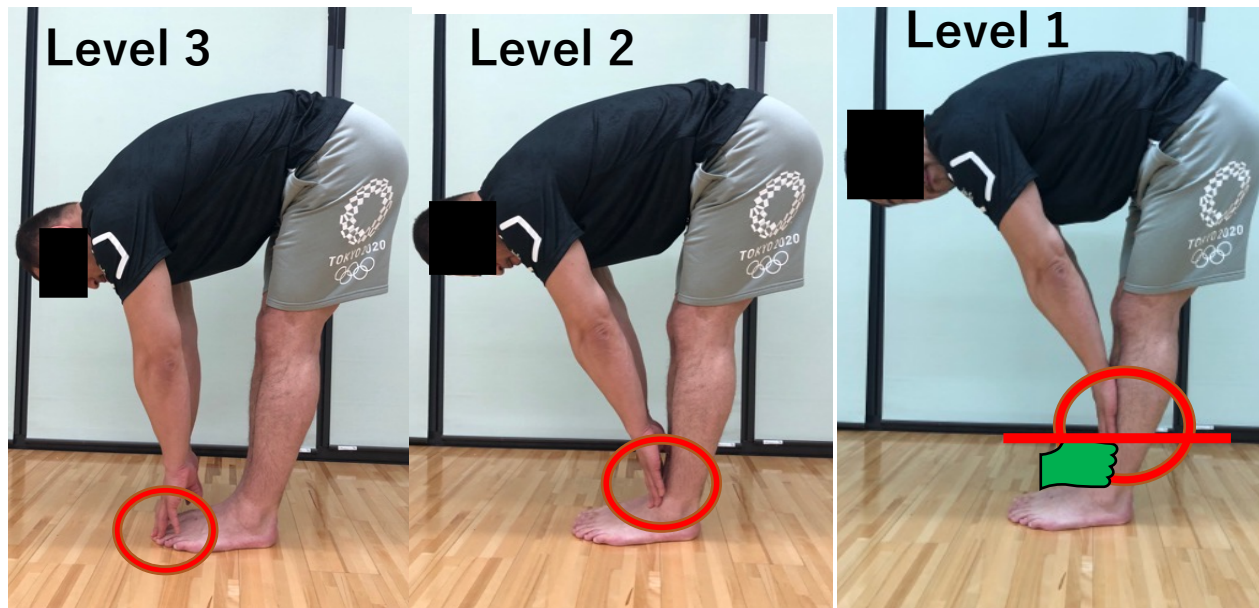

**Movement:** Hip extension (hip flexor tightness), trunk extension (abdominal muscle)

## Instruction & Criteria:

**Level 1)** Stand 1 foot length away from wall with back facing wall, can touch wall with hands over head? Yes: 1pt, No: 0pt

**Level 2)** Stand 2 foot lengths away from wall with back facing wall, can touch wall with hands over head? Yes: 2pt, No: 0pt

**Level 3)** Stand 2 foot and 1 knuckle lengths away from wall with back facing wall, can touch wall with hands over head? Yes: 3pt, No: 0pt

## Extension

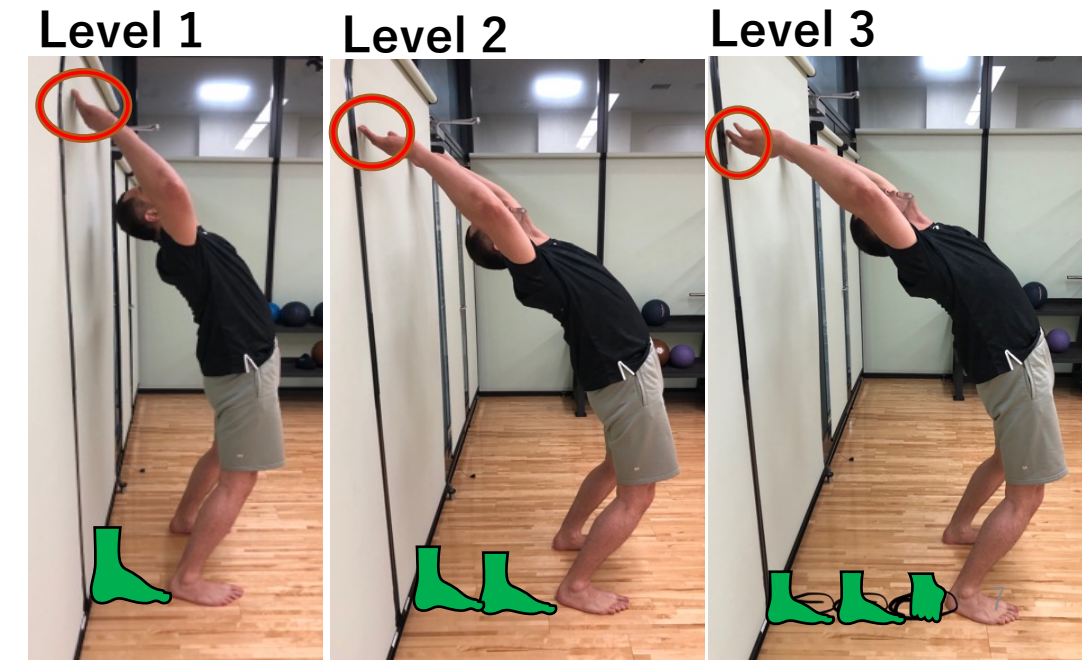



## 8, Upper and Lower Extremity Mobility and Stability (2pt)

**Movement:** Hip flexion, Single leg stability

**Instruction & Criteria:** Stand with feet shoulder width bring one side of elbow and knee together, can hold 5 seconds with elbow and knee together without tilting torso?

L) Yes: 1pt, No: 0pt

R) Yes: 1pt, No: 0pt

**Clearing test:** Checking the ability to maintain a straight back against the wall for accurate measurement.

### Clearing Test

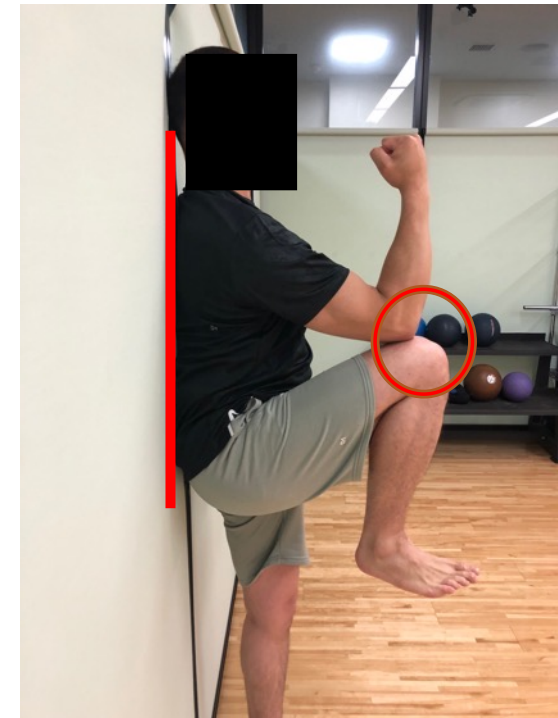

5 sec

L: 1 point, R: 1 point

# 9, Mid-section Stability Strength (4 pt)

**Movement:** Mid-section Stability Strength

## **Instruction & Criteria:**

**Level 1)** Lie on back on floor with knees bent, arms straight by torso, can hold 5 seconds while shoulder blades are away from floor. Yes: 1pt, No: 0pt

**Level 2)** Lie on back on floor with knees straight, arms straight by torso, can hold 5 seconds while shoulder blades are away from floor? Yes: 2pt, No: 0pt

**Level 3)** Lie on back on floor with knees straight, hands on opposite shoulders, can hold 5 seconds while shoulder blades are away from floor? Yes: 3pt, No: 0pt

**Level 4)** Lie on back on floor with knees straight, hands on back of head, can hold 5 seconds while shoulder blades are away from floor? Yes: 4pt, No: 0pt

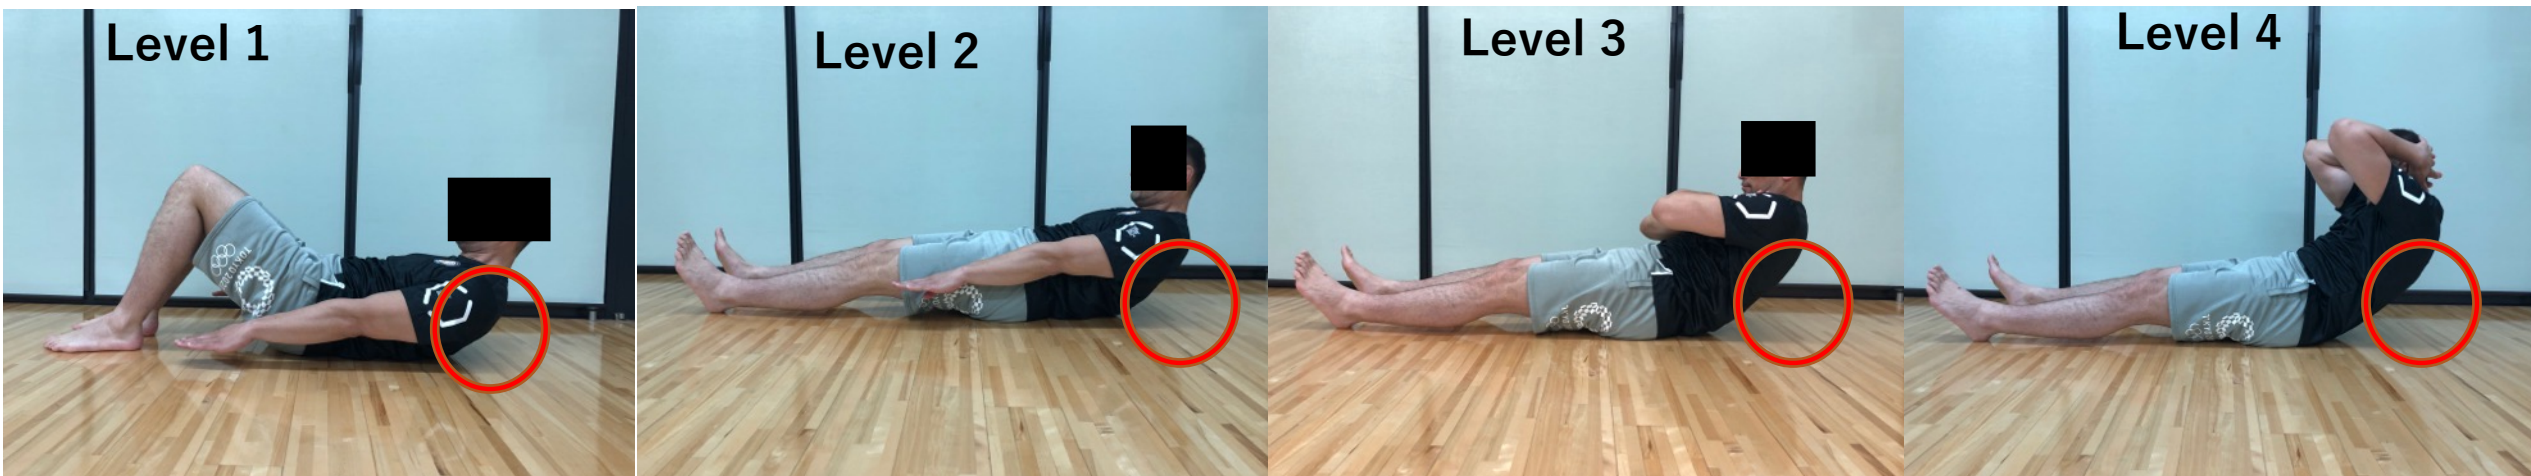

## Movement:

Lower Extremity Strength ,balance

# 10, Lower Extremity Strength (8pt)

### Instruction & Criteria:

**Level 1)** Sit on half kneeling position, hands on front knee, can stand up and down using hands stand up and down without losing control? L) Yes: 1pt, No: 0pt , R) Yes: 1pt, No: 0pt

**Level 2)** Sit on half kneeling position, can hands on waist, stand up and down without losing control? L) Yes: 2pt, No: 0pt , R) Yes: 2pt, No: 0pt

**Level 3)** Sit on chair with one leg off floor, hands on opposite shoulders, can stand up and down without losing control? L) Yes: 3pt, No: 0pt , R) Yes: 3pt, No: 0pt

**Level 4)** Sit on chair with legs crossed, hands on opposite shoulders, can stand up and down without losing control? L) Yes: 4pt, No: 0pt , R) Yes: 4pt, No: 0pt

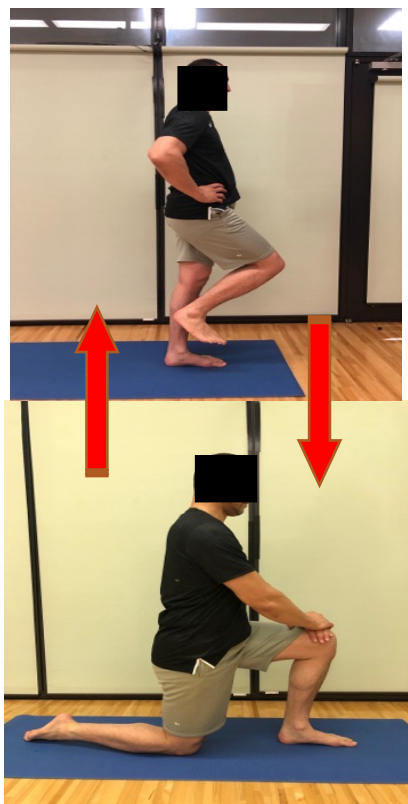

Level 1

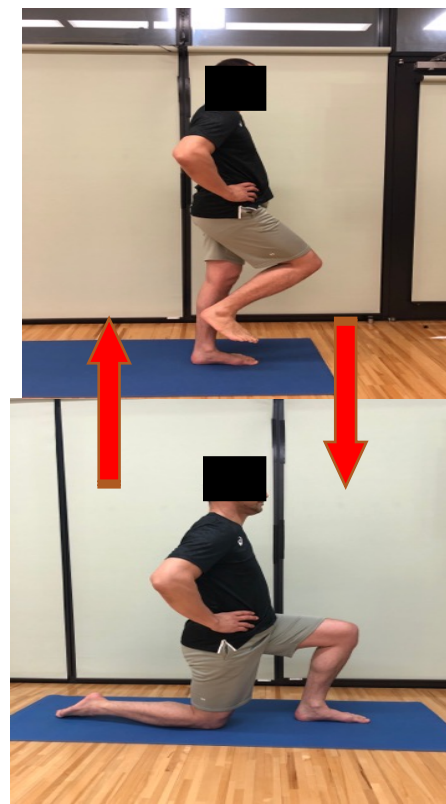

Level 2

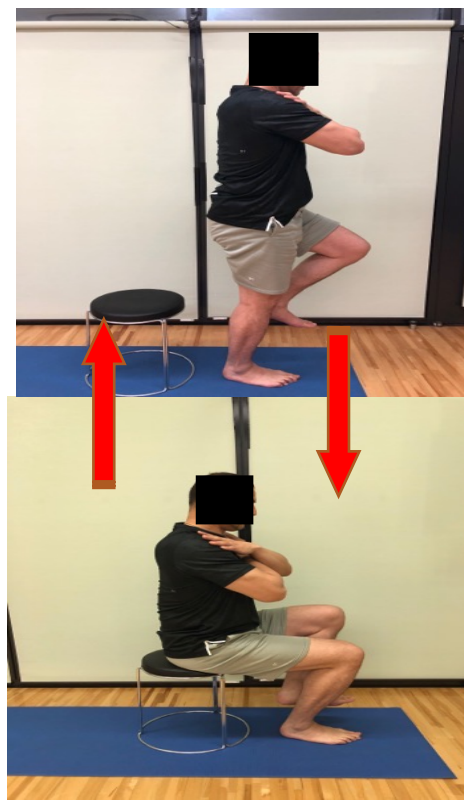

Level 3

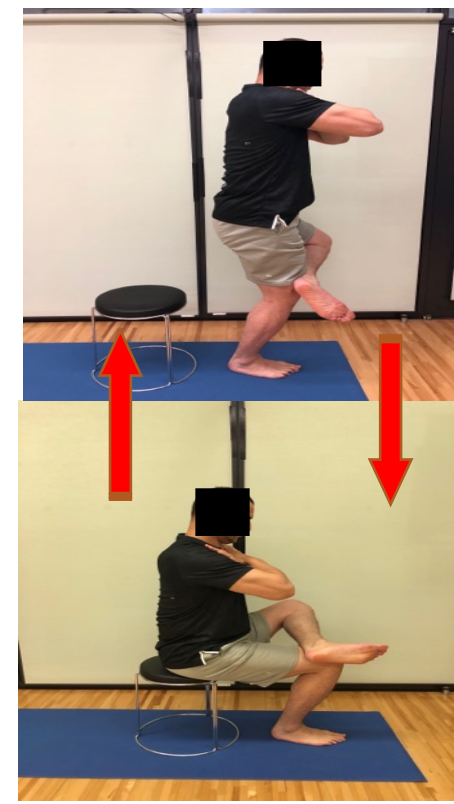

Level 4

# 11, Ankle Mobility (LR 2pt)

## Movement:

Ankle dorsi flexion

**Instruction & Criteria:** Toe 1 knuckle away from wall while in half kneeling, can bring knee to wall, knee touches wall without lifting heel?

L) Yes: 1pt, No: 0pt ,

R) Yes: 1pt, No: 0pt

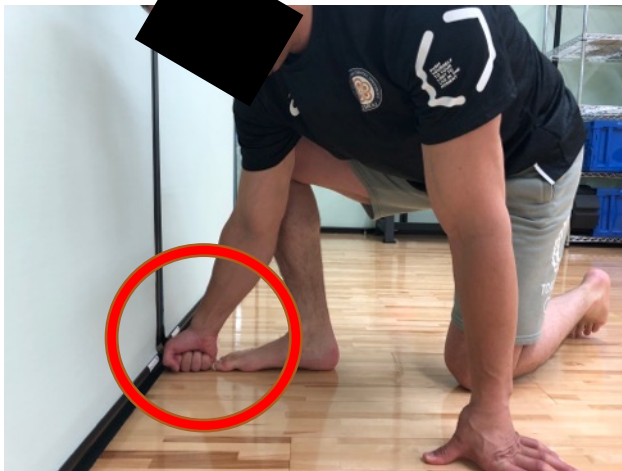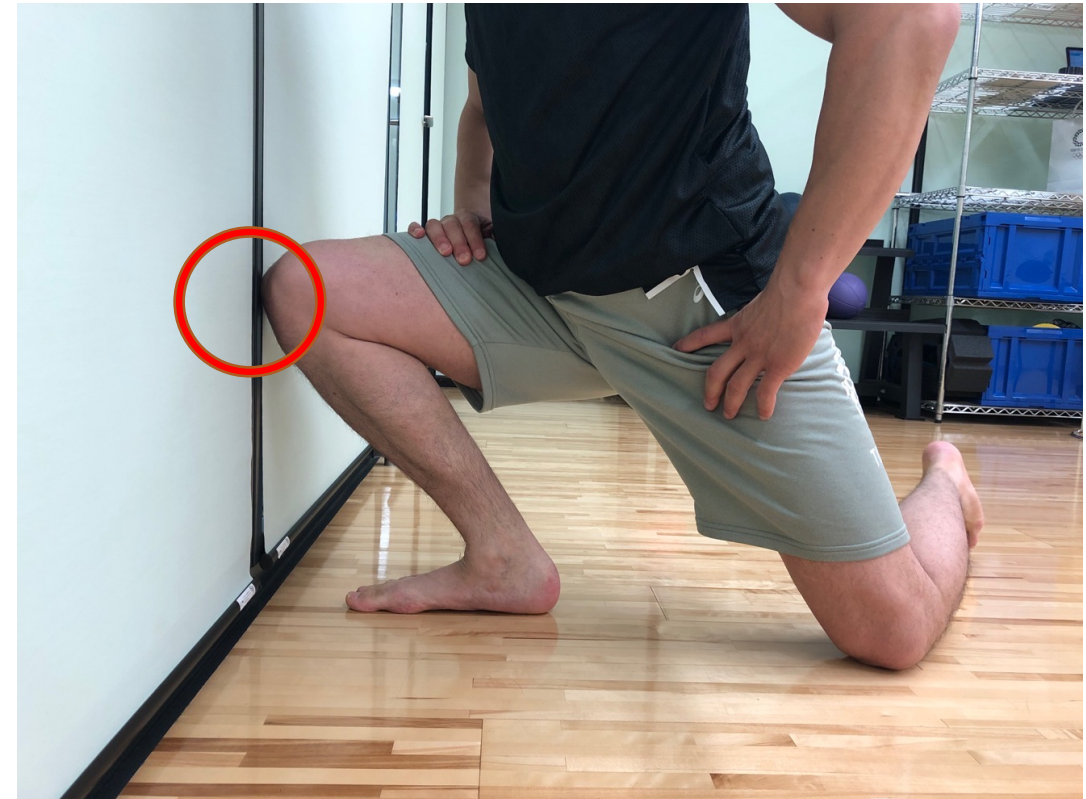

L: 1 point, R: 1 point

# Scoring Chart Sheet

| Name (sports, organization, record, gender, DOB)                        | DATE           | 1            | 2            | 3            | 4            |              |
|-------------------------------------------------------------------------|----------------|--------------|--------------|--------------|--------------|--------------|
| <b>KOJI AWARENESS</b>                                                   |                | <b>TOTAL</b> | <b>SCORE</b> | <b>SCORE</b> | <b>SCORE</b> | <b>SCORE</b> |
| Check 1: Neck Mobility (Total 6 Point)                                  | Front          | 1            |              |              |              |              |
|                                                                         | Back           | 1            |              |              |              |              |
|                                                                         | Left           | 1            |              |              |              |              |
|                                                                         | Right          | 1            |              |              |              |              |
|                                                                         | Right Rotation | 1            |              |              |              |              |
|                                                                         | Right Rotation | 1            |              |              |              |              |
| Check 2: Shoulder Joint Mobility (Total 2 Point)                        | Left           | 1            |              |              |              |              |
|                                                                         | Right          | 1            |              |              |              |              |
| Check 3: Scapular Mobility (Total 2 Point)                              | Left           | 1            |              |              |              |              |
|                                                                         | Right          | 1            |              |              |              |              |
| Check 4: Thoracic Spine Mobility (Total 6 Point)                        | Left           | 3            |              |              |              |              |
|                                                                         | Right          | 3            |              |              |              |              |
| Check 5: Upper Extremity Stability & Strength (Total 4 Point)           |                | 4            |              |              |              |              |
| Check 6: Hip Mobility (Total 8 Point)                                   | Flex/<br>ER    | Left         | 1            |              |              |              |
|                                                                         |                | Right        | 1            |              |              |              |
|                                                                         | Flex/<br>IR    | Left         | 1            |              |              |              |
|                                                                         |                | Right        | 1            |              |              |              |
|                                                                         | Ext/<br>ER     | Left         | 1            |              |              |              |
|                                                                         |                | Right        | 1            |              |              |              |
| Check 7: Hip and Spinal Mobility (Total 6 Point)                        | Front          | 3            |              |              |              |              |
|                                                                         | Back           | 3            |              |              |              |              |
| Check 8: Trunk and Lower Extremity Mobility & Stability (Total 2 Point) | Left           | 1            |              |              |              |              |
|                                                                         | Right          | 1            |              |              |              |              |
| Check 9: Trunk Strength (Total 3 Point)                                 |                | 4            |              |              |              |              |
| Check 10: Lower Extremity Strength (Total 8 Point)                      | Left           | 4            |              |              |              |              |
|                                                                         | Right          | 4            |              |              |              |              |
| Check 11: Ankle Mobility (Total 2 Point)                                | Left           | 1            |              |              |              |              |
|                                                                         | Right          | 1            |              |              |              |              |
| Total Score (50)                                                        |                | 50           | 0            | 0            | 0            | 0            |
